# 1 **Imaging breast cancer using a dual-ligand nanochain particle**

2

3 Gil Covarrubias<sup>1</sup>, Anthony Cha<sup>1</sup>, Abdelrahman Rahmy<sup>1</sup>, Morgan Lorkowski<sup>1</sup>, Vindya Perera<sup>1</sup>,  
4 Bernadette O. Erokwu<sup>2,3</sup>, Chris Flask<sup>2,3,4</sup>, Pubudu M. Peiris<sup>1</sup>, William P. Schiemann<sup>4</sup>, Efstathios  
5 Karathanasis<sup>1,2,3,4</sup>

6

7 <sup>1</sup> Department of Biomedical Engineering, Case Western Reserve University, Cleveland, Ohio

8 <sup>2</sup> Department of Radiology, Case Western Reserve University, Cleveland, Ohio

9 <sup>3</sup> Case Center for Imaging Research, Case Western Reserve University, Cleveland, Ohio

10 <sup>4</sup> Case Comprehensive Cancer Center, Case Western Reserve University, Cleveland, Ohio

11

12 Author to whom correspondence should be addressed: Efstathios Karathanasis

13 2071 Martin Luther King Jr. Drive, Wickenden Building, Cleveland, Ohio 44106, USA

14 Phone: +1-216-844-5281; Fax: +1-216-844-4987; Email: [stathis@case.edu](mailto:stathis@case.edu)

15

16

17

18

19

20

21

22

23

24

25 **ABSTRACT**

26 Nanoparticles often only exploit the upregulation of a receptor on cancer cells to enhance  
27 intratumoral deposition of therapeutic and imaging agents. However, a single targeting moiety  
28 assumes that a tumor is homogenous and static. Tumoral microenvironments are both  
29 heterogenous and dynamic, often displaying variable spatial and temporal expression of  
30 targetable receptors throughout disease progression. Here, we evaluated the *in vivo* performance  
31 of an iron oxide nanoparticle in terms of targeting and imaging of orthotropic mouse models of  
32 aggressive breast tumors. The nanoparticle, a multi-component nanochain, was comprised of 3-  
33 5 iron oxide nanoparticles chemically linked in a linear chain. The nanoparticle's surface was  
34 decorated with two types of ligands each targeting two different upregulated biomarkers on the  
35 tumor endothelium, P-selectin and fibronectin. The nanochain exhibited improved tumor  
36 deposition not only through vascular targeting but also through its elongated structure. A single-  
37 ligand nanochain exhibited a ~2.5-fold higher intratumoral deposition than a spherical  
38 nanoparticle variant. Furthermore, the dual-ligand nanochain exhibited higher consistency in  
39 generating detectable MR signals compared to a single-ligand nanochain. Using a 7T MRI, the  
40 dual-ligand nanochains exhibited highly detectable MR signal within 3h after injection in two  
41 different animal models of breast cancer.

42

43

44

45 **KEYWORDS**

46 Iron oxide nanochains; dual-ligand nanoparticle; breast cancer, MRI

47

48

49

50

51

52

53

## 54 **INTRODUCTION**

55           Imaging is critical for management of patients with breast cancer including diagnosis,  
56 treatment planning and response assessments. To improve cancer imaging, various targeting  
57 schemes have been employed to direct nanoparticle imaging agents to cancers [1, 2]. Traditional  
58 targeting strategies decorate the surface of nanoparticles with a ligand directing them to  
59 upregulated receptors on breast cancer cells within the tumor interstitium. Rather than targeting  
60 the tumor interstitium, an alternative strategy is to use vascular targeting and direct the  
61 nanoparticles to the altered endothelium associated with breast cancer. The endothelium of  
62 tumors, including those of the breast, displays a wide variety of targetable biomarkers that are not  
63 readily found on healthy endothelium. For circulating nanoparticles, the endothelium is the closest  
64 point-of-contact, which facilitates direct access to the targetable vascular biomarkers of the  
65 disease [3-9]. Considering their size and multivalent avidity, nanoparticles are ideal for vascular  
66 targeting.

67           Further, the shape of the nanoparticle can dictate its targeting avidity [7, 10-12]. Recently,  
68 we reported a new one-pot synthetic concept for making multicomponent chain-like nanoparticles  
69 (termed nanochains), which are comprised of about three iron oxide nanospheres chemically  
70 linked into a linear, chain-like assembly [13]. The chain-like shape of the nanoparticles facilitates  
71 geometrically enhanced multivalent attachment on vascular targets, resulting in rapid and  
72 effective deposition of the nanochains onto the endothelium of tumors [5, 8, 13, 14].

73           In addition to adjusting the shape of nanoparticles, they can also be decorated with more  
74 than one type of targeting ligand [3, 15]. This provides great flexibility in the particle's design  
75 allowing targeted nanoparticles to consider the dynamic nature of tumors. As cancer cells evolve,  
76 the surrounding vascular reflects this behavior by having continual changes in the expression of

77 targetable biomarkers both spatially and temporally [16-22]. In previous work [3, 6], we have  
78 shown that a multi-ligand nanoparticle with two or more types of ligands can account for the  
79 spatiotemporal alterations in the expression patterns of targetable receptors on the endothelium  
80 of tumors, which are missed by single-ligand nanoparticles.

81 Here, we evaluated the performance of a dual-ligand nanochain as a targeted MR imaging  
82 agent and its ability to target breast cancer. We employed two different peptides as ligands on  
83 the nanoparticles that target 1) a vascular receptor on the remodeled endothelium of tumors (P-  
84 selectin) [23-33], and 2) an extracellular biomarker in the near-perivascular regions of tumors  
85 (fibronectin) [34-37]. It should be noted that the tumor endothelium often acts as a mirror reflecting  
86 various cancerous activities of the tumor interstitium. Overexpression of P-selectin is linked with  
87 angiogenesis and is prominent on proliferating endothelial cells. On the other hand, abundance  
88 of fibronectin in the perivascular regions of tumors is strongly associated with migration and  
89 invasion of cancer cells. Considering their insignificant expression on the endothelium of healthy  
90 tissues, these biomarkers are an ideal fit to a vascular targeting scheme. Using a mouse  
91 syngeneic model of triple-negative breast cancer, we compared the vascular targeting abilities of  
92 the dual-ligand nanochain to a single-ligand nanochain variant and its spherical counterpart.  
93 Overall, we show that the combination of two different ligands on the nanochain particle effectively  
94 captures the dynamic nature of breast cancers and targets the spatial and temporal variations in  
95 receptor presentation on the tumor endothelium.

## 96 **MATERIALS AND METHODS**

### 97 **Synthesis of Parent Iron Oxide Nanoparticles**

98 Iron oxide nanoparticles are synthesized using a co-precipitation method of Fe(II) and  
99 Fe(III) ions. Briefly, a 2 to 1 molar ratio of  $\text{FeCl}_3 \cdot 6\text{H}_2\text{O}$  and  $\text{FeCl}_2 \cdot 4\text{H}_2\text{O}$  was dissolved in a 5mL  
100 solution of deoxygenated water. To the iron chloride solution, 5mL of a 0.4M HCl solution was  
101 added and allowed to stir vigorously. The iron precursor solution was then added to a 50mL  
102 solution of 0.5M NaOH at 80°C under a constant flow of nitrogen. The reaction continued for an

103 additional 15 minutes with stirring. Upon placing the iron precursor solution in the preheated  
104 NaOH solution, the reaction mixture immediately turned black indicating the formation of iron  
105 oxide nanoparticles. Using magnetic separation, the iron oxide solution was cleaned using  
106 deoxygenated water until a stable ferrofluid was developed. Once a stable ferrofluid was obtained,  
107 the particle volume was increased to a total volume of 50mL using deoxygenated water. In order  
108 to prevent the aggregation of iron oxide nanoparticles, 340 mg of anhydrous citric acid was added  
109 to the particle solution and the pH was consequentially increased to 5.2 using ammonia. This  
110 reaction was heated for 2 hours under a constant flow of nitrogen at 80°C. After the reaction was  
111 completed large and unreacted particles were removed using multiple centrifugation steps at 5000  
112 rpm in 30-minute increments. Excess citric acid was removed using Amicon® Ultra-15 centrifugal  
113 filters.

114 The surface of the iron oxide particle was modified using silane-PEG-NH<sub>2</sub> or silane-PEG-  
115 COOH (2000kDa). Citric coated iron oxide nanoparticles were concentrated to 1mg/mL in Milli-Q  
116 water and the pH was adjusted to 11 using ammonia. 10 mg of silane-PEG-NH<sub>2</sub> was added to  
117 citric coated iron oxides and allowed to react for 24 hours while shaking. The reaction was taken  
118 to completion by heating the nanoparticle solution to 80°C for 2 hours in order to achieve covalent  
119 linking between the iron oxide surface and the polymer. The resultant PEGylated nanoparticles  
120 (Fe<sub>3</sub>O<sub>4</sub>@silane-PEG-COOH or NH<sub>2</sub>), were concentrated using Amicon® Ultra-15 centrifugal  
121 filters. The concentrated IONP-NH<sub>2</sub> solution was stored at 4°C.

122 Fluorescent labelling was used to determine the total amount of functional groups on the  
123 surface of the iron oxide nanoparticles. To assess the quantity of amine functional groups, a 10-  
124 molar excess of Alexa Fluor® 488 NHS ester (Invitrogen, Carlsbad, CA) was added to the IONP-  
125 NH<sub>2</sub> particles and allowed to react for 2 hours in the dark. The excess fluorophore was dialyzed  
126 out in PBS using a 100,000 Da MW cut-off membrane bag. All fluorescent measurements were  
127 performed on a fluorescent plate reader (Synergy HT; BioTek Instruments, Winooski, VT) using  
128 a 480nm excitation and a 520 emission. The fluorescent intensity of the nanoparticles was

129 compared to a standard curve. Iron content was measured using ICP-OES after sample digestion  
130 in a 1 to 4 volumetric ratio of concentrated HNO<sub>3</sub> to concentrated HCl. Iron oxide nanoparticle  
131 calculations were performed assuming only Fe<sub>3</sub>O<sub>4</sub> particles were made and with a 5.2 g/cm<sup>3</sup>  
132 density.

### 133 **Synthesis of Chain-like Nanoparticles**

134 First, the parent nanoparticles (IONP-COOH and IONP-NH<sub>2</sub>) were transferred from water  
135 to dimethylformamide (DMF) and heated to evaporate all water. The concentration of the  
136 nanoparticles was then adjusted to 1 mg/mL Fe. The carboxyl groups on the IONP-COOH  
137 nanoparticles were activated with an excess of *N,N'*-Dicyclohexylcarbodiimide over the available  
138 COOH groups in the presence of pyridine.

139 IONP-NH<sub>2</sub> nanoparticles and the activated IONP-COOH were mixed at a ratio of 2.5:1 and  
140 allowed to react for 30 min. The reaction was then arrested by 'deactivating' the carboxyl groups  
141 using a 10-molar excess of ethylenediamine (relative to the number of carboxyl groups). Finally,  
142 nanochains were transferred to water and were separated by centrifugation with Amicon® Ultra-  
143 15 centrifugal filters. To further clean nanochains from any unreacted parent nanoparticles, a  
144 strong magnet was used.

### 145 **Functionalization of Nanoparticles with Targeting Ligands**

146 Functionalization of nanoparticles with vascular targeting ligands was accomplished via a  
147 sulfo-SMCC crosslinker. The nanoparticle composites, IONP-NH<sub>2</sub> and NC-NH<sub>2</sub>, had terminal  
148 amine groups that are readily available for conjugation with available thiol groups on the cysteine  
149 end of the targeting ligands. Here P-selectin-targeting peptide CDAEWVDVS and fibrin-targeting  
150 peptide CREKA were used. Briefly, sulfo-SMCC contains two functional terminal groups on  
151 contralateral sides; an amine-reactive N-hydroxysuccinimide (NHS ester) and a sulfhydryl-  
152 reactive maleimide group. First, sulfo-SMCC in a 2-molar excess to available amine groups on  
153 the IONP-NH<sub>2</sub> solution and allowed to react for 30 minutes while shaking. Next, a 2:3 molar excess  
154 of sulfo-SMCC to targeting ligand was added and allowed to react for an additional 2 hours while

155 shaking. The functionalized product was dialyzed against PBS using a 100,000 Da MW cut-off  
156 dialysis bag to remove excess peptide and crosslinker. For dual-ligand functionalization equal  
157 molar peptides were added with the overall molar excess to sulfo-SMCC still at a 2:3 molar ratio  
158 (2-moles sulfo-SMCC:1.5 moles fibrin-targeting peptide:1.5 moles P-selectin targeting peptide).

159 Bio-Rad DC protein assay was used to quantify the total number of conjugated peptides.  
160 Here, 200  $\mu$ L of Bio-Rad dye solution (1 to 2 parts Bio-Rad dye and water) was added to an 800  
161  $\mu$ L solution of 10 mg/mL particles and vortexed. The absorbance of the sample was obtained at  
162 595 nm after incubating the sample for 15 minutes. The absorbance value was compared to a  
163 standard curve, which was obtained by measuring the known absorbance of known  
164 concentrations of CREKA, P-selectin peptide or both.

### 165 **Murine Tumor Models**

166 All animal procedures were conducted under a protocol approved by the Institutional  
167 Animal Care and Use Committee (IACUC) at Case Western Reserve University. The well-being  
168 of the animals took priority over continuation of planned interventions. All animals received  
169 standard care, including *ad libitum* access to food and water, a 12/12 light/dark cycle, appropriate  
170 temperature and humidity. All animals received standard care ensuring proper protocol guidelines  
171 were followed.

172 We used two different mammary fat pad models developed from 4T1 and D2.A1 cancer  
173 cell lines. Both cell lines were transfected with both a luciferase and a green fluorescent protein  
174 (GFP) encoding lentivirus. 4T1 and D2.A1 mammary fat pad inoculations were performed per  
175 approved institutional protocol. Briefly,  $0.5 \times 10^6$  4T1-Luc-GFP cells were orthotopically inoculated  
176 in the right 9th inguinal gland of female BALB/cJ mice while anesthetized using an isoflurane  
177 inhalant. Using a previously established timeline, mice studies were performed approximately 10-  
178 14 days post 4T1 inoculations until bioluminescent signals reached  $1-2 \times 10^8$  photons/sec. D2.A1  
179 studies were performed on a similar timeline. The animals were closely monitored on a daily basis  
180 to ensure they did not suffer adverse effects resulting from tumor inoculations.

181           The well-being of the animals took priority over precise measurements in decisions  
182 regarding euthanasia or other interventions. All procedures were conducted using anesthetic to  
183 minimize pain and distress. The inhalant anesthetic, isoflurane, was used as the primary  
184 anesthesia in our experiments. However, developing tumors may ultimately result in some level  
185 of distress or discomfort in these mice. If, during the time following tumor inoculation the animal  
186 showed signs of post-procedure pain, the animal was euthanized. The research team, as well as  
187 the veterinary team of the animal facility, diligently monitored the condition of the animals, and  
188 removed any animal exhibiting signs of pain or distress as soon as humanly possible. When an  
189 animal showed distress or stopped eating and drinking (visually evaluated or there was a 15%  
190 loss of body weight), the animal was immediately euthanized. If it was observed that the tumor  
191 became 10% of the body mass of the animal or if there were changes in grooming, weight,  
192 behaviors, or kyphosis, the animal were immediately euthanized. Additionally, if we observed that  
193 an animal was suffering from inactivity, prostration, labored breathing, sunken eyes, hunched  
194 posture, piloerection/matted fur, unresolving skin ulcers, abnormal vocalization when handled,  
195 emaciation or anorexia, the animal was immediately euthanized. In all cases euthanasia was  
196 carried out in a CO<sub>2</sub> chamber.

### 197 **Bioluminescent and *Ex Vivo* Fluorescent Imaging**

198           Using the IVIS Spectrum system, bioluminescent imaging (BLI) was performed 10 minutes  
199 after an intraperitoneal injection of 200 µL of a 12.5 mg/mL solution of D-luciferin in sterile PBS.  
200 A BLI was taken every 3 days until the terminal point of the study. At the terminal point of the  
201 study, tumors were resected and used for *ex vivo* GFP fluorescent imaging, *ex vivo* tissue  
202 relaxivity or histological analysis.

### 203 **Histological Analysis**

204           Immunohistochemistry was performed to determine the topological distribution of  
205 available targeting sites for the ligands of interest, fibrin-associated proteins and P-selectin. Mice  
206 were anesthetized with an intraperitoneal injection of ketamine/xylazine and transcardially



207 perfused with heparinized PBS followed by 4% paraformaldehyde in PBS. Mammary tumor  
208 tissues were resected and placed in 4% paraformaldehyde for 24 hours. Tumor tissues were  
209 washed 3 times in PBS and placed in a 30% sucrose (w/v) for 48 hours. Finally, the tumor tissues  
210 were placed in OCT and stored at -80°C for two days prior to cryosectioning. Subsequent tissue  
211 sections were sliced at 12  $\mu$ m and used for histological staining. To identify the location of  
212 fibronectin, P-selectin and the tumor microvasculature immunohistochemistry staining was  
213 performed using anti-fibrin and anti-P-selectin primary antibodies for each of the ligands of interest  
214 and an endothelial antigen CD31 for the vasculature. A secondary antibody tagged with Alexa  
215 Fluor® 568 was added to do fluorescent imaging on the stained tissue sections. The tissue  
216 sections were counterstained using a DAPI nuclear stain. Tumor cells were imaged with their GFP  
217 tagged marker. The tissue sections were imaged at 5x, 10x and 20x using a Zeiss Axio Observer  
218 Z1 motorized inverted fluorescent microscope. For larger sized montages, the Axio Vision  
219 software automatic tiling was achieved using the Mosaic acquisition feature. Nanochain particles  
220 were detected using a Prussian Blue stain and imaged using brightfield.

### 221 ***Ex Vivo* Tissue Relaxivity**

222 The *ex vivo* tissue relaxivity was calculated using a 1.5 T Bruker Minispec mq60. Mice  
223 were anesthetized with an intraperitoneal injection of ketamine/xylazine and transcardially  
224 perfused with heparinized PBS. Kidneys, liver, spleen, lungs and tumors were excised and  
225 grinded in 1 mL of water. Grounded tissues were placed in 5mm disposable grade NMR tubes.  
226 Samples were placed in the 1.5 T Bruker Minispec and relaxation values were recorded for use  
227 in the analysis of tissue relaxivity per mass of collected tissue.

### 228 **MR imaging**

229 MR images were acquired using a 7 T Bruker MRI system. A volume coil (3.5 cm inner  
230 diameter) was employed. The sequence used was a Rapid Acquisition with Relaxation  
231 Enhancement (RARE). High-resolution images were obtained before and 3 hours after IV injection  
232 of the nanochains (at a dose of 10 mg Fe per kg b.w.) using a  $T_2$ -weighted RARE sequence with

233 the following parameters: TR/TE = 3646.6/31 ms, matrix = 256 × 256, FOV = 3 × 3 cm, and 5  
234 averages. The acquisition time approximately 10 minutes using a gating acquisition method. This  
235 resulted in an in-plane spatial resolution of 111.7 μm and a slice thickness of 1 mm.

## 236 **Statistical Analysis**

237 Statistics were performed in Prism version 7 for Mac (GraphPad Software, La Jolla, CA,  
238 USA). All the experiments were performed in triplicates unless stated otherwise. Data are  
239 represented as mean ± s.d. In cases where data met the assumptions necessary for parametric  
240 statistics, analysis of differences between two groups was performed using two-tailed Student's t-  
241 test assuming equal variance. Data from three or more groups were analyzed with a one-way  
242 analysis of variance (ANOVA) that was corrected for multiple comparisons using the Holm–Sidak  
243 method.

244 To determine the detection accuracy of particle conjugates z-score probabilities values  
245 were obtained to evaluate the effective belongingness of a single particle conjugate member to a  
246 healthy mammary fat pad population. The z-score probabilities were obtained via a confidence  
247 interval of 90% ( $\alpha$  was set to 0.1). If a population member fell inside of the 90% confidence interval  
248 it was considered to be part of the healthy mammary fat pad population; these members were  
249 considered to be false negatives as the tumors were present however the p-values indicated they  
250 fell in the healthy population.

## 251 **RESULTS**

### 252 **Nanoparticle Fabrication**

253 We recently developed a new simple 'one-pot' synthetic concept for making iron oxide  
254 nanochains with high yield and consistency [13]. Fig 1a shows an illustration of the nanochain  
255 particles. Briefly, the one-pot synthesis utilized two types of the parent iron oxide nanoparticle  
256 (IONP) based on the functional group on the particle's surface (Fig 1b). The IONP were decorated  
257 with either PEG-amine (NP-NH<sub>2</sub>) or PEG-carboxyl (NP-COOH). First, the carboxyl groups on the

258 NP-COOH particles were activated with DCC. To avoid hydrolysis of the activated COOH  
259 intermediate, the one-pot synthesis was performed in an organic solvent (*i.e.*, absence of water).  
260 Once activated NP-COOH and NP-NH<sub>2</sub> were mixed, the nanoparticles started reacting with each  
261 other. The reaction rate and size of the agglomerates can be dictated by the stirring rate,  
262 stoichiometry and concentration of the starting IONP particles. By mixing NP-NH<sub>2</sub> and NP-COOH  
263 at a ratio of ~2:1, two NP-NH<sub>2</sub> particles were initially linked with one 'activated' NP-COOH forming  
264 a trimeric nanochain. We identified the optimal reaction time and parameters that generated well-  
265 defined short nanochains and not large agglomerates. Using dynamic light scattering, longitudinal  
266 measurement of the hydrodynamic size of the reaction mixture indicated the progression and  
267 growth of the nanochain. Fig 1c shows that the two populations of the starting parent IONP with  
268 sizes of 21 and 33 nm disappeared, while the nanochains appeared in a new population with the  
269 mean size being ~80 nm. The size and structure of the nanochains was confirmed in TEM images  
270 (Fig 1d). The iron concentration was measured using ICP-OES, which was used in all the *in vivo*  
271 studies to accurately calculate the dose of the agents that was injected into the animals. Based  
272 on previous work [13], we also quantified the number of primary amines on the surface of  
273 nanochains using fluorescence labelling. To determine the number of surface amines, an excess  
274 of Alexa Fluor® 488 NHS ester reacted with the nanoparticles for 2h followed by extensive dialysis  
275 to remove unbound fluorophore. Fluorescence measurements showed that the nanochain  
276 exhibited about 700 amines per particle. The fibronectin-targeting peptide (CREKA) and P-  
277 selectin-targeting peptide CDAEWVDVS were effectively conjugated onto the available amines  
278 on the surface of the nanochains using the heterobifunctional crosslinker sulfo-SMCC. Using  
279 HPLC assays, the number of peptides was quantified confirming that the single-ligand nanochains  
280 displayed ~700 peptides per particle, whereas the dual-ligand variant had the available amines  
281 split approximately in half for each peptide. More details on the synthesis and characterization of  
282 the nanochains can be found in a previous publication [13].

283

284 **Fig 1.** *Synthesis and characterization of the nanochain particles. (a) Illustration shows the dual-*  
285 *ligand nanochain particle. (b) Reaction scheme shows the synthesis of nanochains using parent*  
286 *iron oxide nanoparticles with different surface functionality. (c) The size of the parent*  
287 *nanoparticles and nanochains was measured using dynamic light scattering (DLS). (d) TEM*  
288 *image of nanochain particles is shown. (e) The transverse (R2) relaxivity of the nanochains was*  
289 *measured at 1.5 Tesla using a relaxometer.*

290

## 291 **Organ distribution**

292 We evaluated the biodistribution of the dual-ligand nanochains in the liver, spleen, lungs  
293 and kidneys of mice 3 h after systemic administration *via* tail vein injection. The 3-hour time point  
294 was selected based on the timeframe of vascular targeting of nanoparticles as explained in the  
295 next section. The organ distribution of the dual-ligand nanochain was compared to a single-ligand  
296 nanochain, the non-targeted nanochain variant, and the parent IONP with a single ligand. In  
297 previous studies [13], the tissue deposition of targeted iron oxide nanoparticles was measured  
298 using ICP-OES, which provided direct measurement of iron concentration in tissues using ICP.  
299 However, the MR signal from tissues does not always correspond to the exact concentration of  
300 the iron oxide particles in tissues. Iron oxide particles exhibit complex relaxation properties *in vivo*,  
301 which is significantly influenced by iron clustering in the case of intracellular internalization of the  
302 nanoparticles. Since the intended use of the dual-ligand nanochain is as an MR imaging agent,  
303 we elected to measure the R2 relaxation rate in tissue as a surrogate metric of MR signal with  
304 higher R2 value indicating stronger signal. Briefly, 3 h after injection of the nanoparticles, mice  
305 were transcardially perfused with PBS and each organ was excised and homogenized. The  
306 relaxation of samples of the homogenate was measured using a 1.5 T Bruker Minispec and was  
307 recorded as tissue relaxivity per gram of tissue. This provided a robust method to measure  
308 multiple samples in a convenient and quantitative manner. Fig 2 shows a comparison of the organ  
309 distribution of the different nanoparticle variants. We tested dual-ligand nanochains targeting

310 fibronectin and P-selectin, non-targeted nanochains, single-ligand nanochains targeting P-  
311 selectin, and single-ligand parent IONP targeting P-selectin. All the nanoparticles displayed  
312 similar biodistribution patterns with the majority of the particles being cleared by the  
313 reticuloendothelial organs (liver and spleen). The only difference was the higher clearance of the  
314 spherical IONP from the spleen compared to all the nanochain formulations. This was in good  
315 agreement with previous observations [5, 13, 38]. Further, the signal from the lungs and kidneys  
316 was negligible for all formulations. These findings indicate that the use of one or two ligands did  
317 not alter significantly the overall biodistribution patterns of the nanochains.

318

319 **Fig 2.** *Organ distribution of targeting variants of spherical or chain-like iron oxide nanoparticles.*  
320 *Mice were systemically injected with nanoparticles at a dose of 10 mg/kg Fe. The dual-ligand*  
321 *nanochain was compared to non-targeted nanochain, single-ligand nanochain targeting P-*  
322 *selectin and single-ligand spherical nanoparticles targeting P-selectin (n=5 mice per formulation).*  
323 *Animals were euthanized 3 h after injection and organs were extracted and homogenized. The*  
324 *relaxation of the homogenate of different organs was measured using a 1.5 T Bruker Minispec*  
325 *and was recorded as tissue relaxivity per gram of tissue.*

326

## 327 **Tumor targeting**

328 For these studies, we used the D2.A1 cancer cell line, which is a syngeneic mouse model  
329 of triple-negative breast cancer. The D2.A1 cell line was engineered to stably express firefly  
330 luciferase and green fluorescent protein (GFP). Using this cell line, we developed an orthotopic  
331 D2.A1 model by inoculating the cancer cells into the mammary fat pad of BALB/c mice. Being a  
332 very aggressive breast cancer, the typical survival of the animals is about 25 days. Bioluminescent  
333 imaging was conducted ever 2-3 days post inoculation to monitor tumor growth. Animals were  
334 selected for the targeting studies when bioluminescence signal of the tumor reached a value of  
335 about  $1.5 \times 10^8$  photons/s (approximately 2 weeks after tumor inoculation).

336 First, we compared the targeting performance of a single-ligand nanochain to its spherical  
337 IONP counterpart. It should be noted that the spherical nanoparticles were the parent particles  
338 used for the fabrication of the nanochains. Our previous studies showed that deposition of  
339 targeted nanoparticles onto the endothelium of tumors is rapid and is maximized within 3 h after  
340 systemic administration [3, 5, 6, 13]. Thus, we selected the 3-hour time point as the terminal point  
341 when the tumors were perfused, excised, and homogenized. The relaxation of the tumor  
342 homogenate was measured using a 1.5 T Bruker Minispec. As expected, when compared to  
343 nanospheres, the nanochains favored tumor deposition due to geometrically enhanced targeting  
344 of the tumor endothelium. Fig 3a shows that the single-ligand nanochains targeting P-selectin  
345 exhibited about a 2.5-fold higher intratumoral deposition than their spherical counterpart. This is  
346 in good agreement with a previous study that showed that nanochains facilitated superior vascular  
347 targeting of brain tumors than spherical nanoparticles [13]. We then compared a single-ligand  
348 nanochain to the dual-ligand nanochain. In a previous study, we showed that P-selectin-targeting  
349 nanoparticles had similar intratumoral deposition to fibronectin-targeting nanoparticles [6]. Thus,  
350 we tested only one of the two possible single-ligand nanochain variants. As shown in Fig 3b, the  
351 dual-ligand nanochains did not significantly outperform their single-ligand variants. However,  
352 comparisons of the average values of each group often does not reveal the entire diagnostic  
353 performance. For example, the single-ligand formulation could not consistently discriminate  
354 cancerous tissues even though we carefully selected animals with similar tumor burdens (Fig 3c).  
355 On the other hand, the dual-ligand formulation exhibited 100% success in separating tumor from  
356 healthy mammary tissues (Fig 3d). In previous studies, we have observed a similar consistency  
357 of targeting accuracy of multi-ligand nanoparticles in brain tumors [13] and metastasis [3].

358  
359 **Fig 3.** Comparison of tumor targeting accuracy of different targeted nanoparticles. (a) Single-  
360 ligand nanochains targeting P-selectin and their spherical counterparts were IV injected in mice  
361 bearing mammary D2.A1 tumors. All formulations were administered at the same dose (10 mg/kg

362 *Fe*). The animals were perfused 3 h after injection and the tumors were excised, homogenized  
363 and measured using a 1.5 T Bruker Minispec (data are represented as mean  $\pm$  s.d.; n=5 mice in  
364 each group; unpaired t-test, P values: \*\*\*\*<0.0001). (b) The endogenous relaxation rate (R2) of  
365 healthy mammary tissue were compared to those of tumor bearing mice after systemic injection  
366 of single-ligand or dual-ligand nanochains (data are represented as mean  $\pm$  s.d.; n=5 mice in each  
367 group; unpaired t-test, P values: \*\*<0.005). (c) Quantification of the bioluminescent signal  
368 indicated similar tumor burden of the different groups of animals. (d) Z-score analysis was  
369 performed to identify the belongingness of each tumor bearing mouse injected with a formulation  
370 to a healthy mammary population. If the z-score probability value was larger than an alpha of  
371 0.05, it signified that it was likely that the R2 value belonged to that of a healthy mammary tissue  
372 as opposed to a diseased mammary.

373

#### 374 **Imaging of breast tumors using MRI**

375 The ability of the dual-ligand nanochain to image breast cancer was tested using a 7T  
376 MRI. In addition to the orthotopic D2.A1 mouse model, we also used the orthotopic 4T1 mouse  
377 model (n=3 for each tumor model). The 4T1 model is one of the standard models to study TNBC  
378 development in immunocompetent mice. MR imaging was performed before and 3 h after tail-  
379 vein injection of the dual-ligand nanochains at a dose of 10 mg/kg Fe. We used the same scanning  
380 parameters in the pre- and post-injection images. The pre- and 3h post-injection images were  
381 compared quantitatively by measuring the absolute MR signal intensity in the tumor and healthy  
382 mammary fat pad. The signal intensity was normalized to the signal of the healthy mammary  
383 tissue (scale: 0-1). A low value indicates high contrast in T2 images, whereas a value of 1  
384 indicates no contrast compared to the pre-injection image. Fig 4a summarizes the measurements.  
385 The pre-injection values of the tumors in the D2.A1 and 4T1 mouse models were close to 1  
386 indicating negligible contrast compared to health mammary. On the other hand, injection of the  
387 dual-ligand nanochains generated significant contrast enhancement in the tumors with a

388 normalized value of 0.82 and 0.59 for the 4T1 and D2.A1 tumors, respectively. Fig 4b shows  
389 representative sagittal T2-weighted images before and 3 h after injection of the dual-ligand  
390 nanochains in the D2.A1 mouse model.

391  
392 **Fig 4.** MR imaging of mice bearing mammary breast tumors using dual-ligand nanochains and a  
393 7T MRI. (a) Animals with 4T1 or D2.A1 mammary tumors were imaged before and 3 h after tail  
394 vein injection of dual-ligand nanochains at a dose of 10 mg/kg Fe. The signal intensity was  
395 measured in the tumor and healthy mammary fat pad. The signal intensity normalized to the signal  
396 of the healthy mammary tissue (scale: 0-1). The normalized values of 0 and 1 correspond to  
397 maximum and minimum contrast, respectively, compared to the pre-injection values of healthy  
398 mammary tissue (data are represented as mean  $\pm$  s.d.; n=3 mice for each animal model; unpaired  
399 t-test, P values: \* $<0.05$ , \*\* $<0.005$ ). (b) Representative sagittal T2-weighted images of a mouse  
400 bearing a D2.A1 mammary tumor before and 3 h after injection of dual-ligand nanochains.

401

402

### 403 **Histological evaluation**

404 We performed histological analysis to confirm vascular targeting and deposition of the  
405 dual-ligand nanochains in tumors. After the last MRI session, mice were intracardially perfused  
406 with heparinized PBS. Tumors and normal mammary tissues were collected and processed for  
407 histological evaluation. Direct fluorescence imaging of GFP (green) indicated the location of  
408 breast cancer cells. The tissue slices were also immunohistochemically stained for the endothelial  
409 antigen CD31, anti-fibronectin antibody and anti-P-selectin antibody. Using fluorescence  
410 microscopy, Fig 5a shows representative images of the tumor indicating that the endothelium and  
411 near-vascular regions exhibited overexpression of fibronectin and P-selectin. We should note that  
412 negligible expression of fibronectin or P-selectin was observed on the endothelium in healthy  
413 mammary tissues (images not shown). The associated expression of P-selectin and endothelium



414 with respect to tumor endothelium should favor vascular targeting of the dual-ligand nanochains.  
415 In addition to fluorescence microscopy, bright-field microscopy was performed on the same  
416 histological sections using the Prussian blue stain to visualize the iron oxide nanochains. Fig 5b  
417 shows that dual-ligand nanochains were predominantly distributed around blood vessels in the  
418 tumor.

419  
420 **Fig 5.** *Histological evaluation of the expression of vascular biomarkers and intratumoral*  
421 *deposition of targeted nanoparticles in the orthotopic D2.A1 mouse model. (a) Mice bearing*  
422 *mammary D2.A1 tumors were euthanized 3 h after tail vein injection of dual-ligand nanochains at*  
423 *a dose of 10 mg/kg iron. After perfusion, tumors were excised and processed for histology. Images*  
424 *from serial tissue sections show that topology of fibronectin and P-selectin with respect to the*  
425 *endothelium (10x magnification; nuclear stain: blue; cancer cells: green; CD31 endothelial marker*  
426 *or fibronectin or P-selectin: red; overlay: yellow). (b) The near-perivascular deposition of the dual-*  
427 *ligand nanochain was identified through an iron stain (left panel: 10x magnification; nuclear stain:*  
428 *blue and CD31 endothelial marker: red; middle and right panels: 20x magnification; iron stain:*  
429 *Prussian blue).*

430

## 431 **DISCUSSION**

432 Due to their size and multivalent avidity, nanoparticles are ideal for vascular targeting of  
433 upregulated biomarkers on the tumor endothelium. Since the endothelium is the closest point-of-  
434 contact, circulating nanoparticles in the bloodstream have direct access to scavenge the  
435 endothelium for vascular biomarkers of cancer. Recently, we reported a new one-pot synthetic  
436 concept for making multicomponent chain-like nanoparticles (termed nanochains), which are  
437 comprised of about three iron oxide nanospheres chemically linked into a linear assembly [13].  
438 Here we showed that targeting avidity can be dictated by adjusting the shape. Within 3 h post-

439 injection, vascular targeting of nanochains targeting P-selectin resulted in a 2.5-fold higher  
440 deposition in breast tumors than targeting equivalent spherical nanoparticles.

441 Traditional targeting strategies use a single-ligand system that considers cancer as a  
442 monolithic disease and fails to account for tumor heterogeneity. However, aggressive breast  
443 tumors exhibit a dynamic tumor microenvironment with targetable vascular biomarkers being  
444 continuously changing over time and space [39]. In this context, our previous studies showed  
445 that vascular biomarkers often exhibited spatiotemporal variability, representing different stages  
446 of tumor development [3]. Considering then that the altered endothelium associated with breast  
447 cancer displays a diverse and dynamic set of targetable biomarkers, a combination of different  
448 ligands on the same particle may be required to efficiently direct a nanoparticle to the majority of  
449 a tumor volume.

450 In previous studies [3-9], we tested different peptides to direct nanoparticles to different  
451 vascular biomarkers that represent various microenvironments of breast cancer, including  $\alpha_v\beta_3$   
452 integrin, P-selectin, EGFR, PTP $\mu$ , and fibronectin. In this work, we selected to target P-selectin  
453 and fibronectin that represent different cancerous activities and stages of breast cancer  
454 development. Upregulation of P-selectin is pronounced on proliferating endothelial cells and is  
455 associated with the early response of cancer cells to hypoxia development and angiogenesis. On  
456 the other hand, perivascular overexpression of fibronectin is critical in the migration and invasion  
457 of cancer cells [34-37]. Not surprising, the dual-ligand nanochain variants exhibited significant  
458 intratumoral deposition. We selected iron oxide as our nanomaterial basis due to its ability to  
459 generate significant contrast in MR imaging. In two different animal models of breast cancer, MR  
460 imaging and the dual-ligand nanochain facilitated precise detection of breast cancer. Taking under  
461 consideration that diagnosis, treatment planning and response assessments of breast cancer rely  
462 heavily on imaging, a more accurate imaging test for breast cancer can change patient  
463 management by guiding early therapeutic interventions before the disease becomes  
464 unmanageable.

## 465 **CONCLUSIONS**

466           The multicomponent nanochain represents a higher order nanostructure that is comprised  
467 of individual nanoparticles. By utilizing a simple 'one-pot' synthesis, nanochains were fabricated  
468 with high reproducibility, yield and consistency across batches. Further, the combination of two  
469 different ligands on the same nanochain particle effectively targeted the dynamic nature of breast  
470 tumors and generated highly detectable MR signals.

471

## 472 **ACKNOWLEDGEMENTS**

473           This work was partially supported by grants from the National Cancer Institute  
474 (R01CA177716, U01CA198892), the Alex's Lemonade Stand Foundation and the Angie Fowler  
475 AYA Cancer Research Initiative of the Case Comprehensive Cancer Center (E.K.). G.C. was  
476 supported by a fellowship from the NIH Interdisciplinary Biomedical Imaging Training Program  
477 (T32EB007509) administered by the Department of Biomedical Engineering, Case Western  
478 Reserve University.

479

## 480 **REFERENCES**

- 481 1. Zhou Z, Lu ZR. Molecular imaging of the tumor microenvironment. *Adv Drug Deliv*  
482 *Rev.* 2017;113:24-48. Epub 2016/08/09. doi: 10.1016/j.addr.2016.07.012. PubMed  
483 PMID: 27497513.
- 484 2. Toy R, Bauer L, Hoimes C, Ghaghada KB, Karathanasis E. Targeted  
485 nanotechnology for cancer imaging. *Adv Drug Deliv Rev.* 2014;76:79-97. doi:  
486 10.1016/j.addr.2014.08.002. PubMed PMID: 25116445; PubMed Central PMCID:  
487 PMC4169743.

- 488 3. Doolittle E, Peiris PM, Doron G, Goldberg A, Tucci S, Rao S, et al. Spatiotemporal  
489 Targeting of a Dual-Ligand Nanoparticle to Cancer Metastasis. *ACS Nano*.  
490 2015;9(8):8012-21. doi: 10.1021/acsnano.5b01552. PubMed PMID: 26203676;  
491 PubMed Central PMCID: PMC4579532.
- 492 4. Toy R, Hayden E, Camann A, Berman Z, Vicente P, Tran E, et al. Multimodal in vivo  
493 imaging exposes the voyage of nanoparticles in tumor microcirculation. *ACS Nano*.  
494 2013;7(4):3118-29. doi: 10.1021/nn3053439. PubMed PMID: 23464827; PubMed  
495 Central PMCID: PMC3640526.
- 496 5. Peiris PM, Toy R, Doolittle E, Pansky J, Abramowski A, Tam M, et al. Imaging  
497 metastasis using an integrin-targeting chain-shaped nanoparticle. *ACS Nano*.  
498 2012;6(10):8783-95. doi: 10.1021/nn303833p. PubMed PMID: 23005348.
- 499 6. Peiris PM, He F, Covarrubias G, Raghunathan S, Turan O, Lorkowski M, et al.  
500 Precise targeting of cancer metastasis using multi-ligand nanoparticles incorporating  
501 four different ligands. *Nanoscale*. 2018;10(15):6861-71. Epub 2018/04/06. doi:  
502 10.1039/c8nr02513d. PubMed PMID: 29620124; PubMed Central PMCID:  
503 PMCPMC5908762.
- 504 7. Toy R, Peiris PM, Ghaghada KB, Karathanasis E. Shaping cancer nanomedicine:  
505 the effect of particle shape on the in vivo journey of nanoparticles. *Nanomedicine*  
506 (Lond). 2014;9(1):121-34. doi: 10.2217/nnm.13.191. PubMed PMID: 24354814.
- 507 8. Peiris PM, Toy R, Abramowski A, Vicente P, Tucci S, Bauer L, et al. Treatment of  
508 cancer micrometastasis using a multicomponent chain-like nanoparticle. *J Control*  
509 *Release*. 2014;173:51-8. doi: 10.1016/j.jconrel.2013.10.031. PubMed PMID:  
510 24188960.

- 511 9. Peiris PM, Deb P, Doolittle E, Doron G, Goldberg A, Govender P, et al. Vascular  
512 Targeting of a Gold Nanoparticle to Breast Cancer Metastasis. *J Pharm Sci.*  
513 2015;104(8):2600-10. doi: 10.1002/jps.24518. PubMed PMID: 26036431.
- 514 10. Gavze E, Shapiro M. Motion of inertial spheroidal particles in a shear flow near a  
515 solid wall with special application to aerosol transport in microgravity. *Journal of Fluid*  
516 *Mechanics.* 1998;371:59±79.
- 517 11. Lee SY, Ferrari M, Decuzzi P. Shaping nano-/micro-particles for enhanced vascular  
518 interaction in laminar flows. *Nanotechnology.* 2009;20 495101 (11pp).
- 519 12. Gentile F, Chiappini C, Fine D, Bhavane RC, Peluccio MS, Cheng MM, et al. The  
520 effect of shape on the margination dynamics of non-neutrally buoyant particles in  
521 two-dimensional shear flows. *J Biomech.* 2008;41(10):2312-8. Epub 2008/06/24.  
522 doi: S0021-9290(08)00150-4 [pii] 10.1016/j.jbiomech.2008.03.021. PubMed PMID:  
523 18571181.
- 524 13. Perera VS, Covarrubias G, Lorkowski M, Atukorale P, Rao A, Raghunathan S, et al.  
525 One-pot synthesis of nanochain particles for targeting brain tumors. *Nanoscale.*  
526 2017;9(27):9659-67. doi: 10.1039/c7nr02370g. PubMed PMID: 28675230; PubMed  
527 Central PMCID: PMC5557407.
- 528 14. Peiris PM, Abramowski A, Mcginnity J, Doolittle E, Toy R, Gopalakrishnan R, et al.  
529 Treatment of invasive brain tumors using a chain-like nanoparticle. *Cancer*  
530 *Research.* 2015;75(7):1356-65.
- 531 15. Saul JM, Annapragada AV, Bellamkonda RV. A dual-ligand approach for enhancing  
532 targeting selectivity of therapeutic nanocarriers. *J Control Release.*

- 533 2006;114(3):277-87. Epub 2006/08/15. doi: S0168-3659(06)00250-1 [pii]  
534 10.1016/j.jconrel.2006.05.028. PubMed PMID: 16904220.
- 535 16. Gay LJ, Felding-Habermann B. Contribution of platelets to tumour metastasis. Nat  
536 Rev Cancer. 2011;11(2):123-34. Epub 2011/01/25. doi: nrc3004 [pii]  
537 10.1038/nrc3004. PubMed PMID: 21258396.
- 538 17. Fukumura D, Jain RK. Tumor microenvironment abnormalities: causes,  
539 consequences, and strategies to normalize. Journal of cellular biochemistry.  
540 2007;101(4):937-49. PubMed PMID: 17171643.
- 541 18. Hobbs SK, Monsky WL, Yuan F, Roberts WG, Griffith L, Torchilin VP, et al.  
542 Regulation of transport pathways in tumor vessels: role of tumor type and  
543 microenvironment. Proc Natl Acad Sci U S A. 1998;95(8):4607-12. PubMed PMID:  
544 9539785; PubMed Central PMCID: PMC22537.
- 545 19. Karathanasis E, Suryanarayanan S, Balusu SR, McNeeley K, Sechopoulos I,  
546 Karellas A, et al. Imaging nanoprobe for prediction of outcome of nanoparticle  
547 chemotherapy by using mammography. Radiology. 2009;250(2):398-406. PubMed  
548 PMID: 19188313.
- 549 20. Huebschman ML, Lane NL, Liu H, Sarode VR, Devlin JL, Frenkel EP. Molecular  
550 heterogeneity in adjacent cells in triple-negative breast cancer. Breast cancer.  
551 2015;7:231-7. doi: 10.2147/BCTT.S87041. PubMed PMID: 26316815; PubMed  
552 Central PMCID: PMC4540115.
- 553 21. Norton KA, Popel AS, Pandey NB. Heterogeneity of chemokine cell-surface receptor  
554 expression in triple-negative breast cancer. American journal of cancer research.

- 555 2015;5(4):1295-307. PubMed PMID: 26101698; PubMed Central PMCID:  
556 PMC4473311.
- 557 22. Martinez-Revollar G, Garay E, Martin-Tapia D, Nava P, Huerta M, Lopez-Bayghen  
558 E, et al. Heterogeneity between triple negative breast cancer cells due to differential  
559 activation of Wnt and PI3K/AKT pathways. *Exp Cell Res*. 2015;339(1):67-80. doi:  
560 10.1016/j.yexcr.2015.10.006. PubMed PMID: 26453937.
- 561 23. Schnell O, Krebs B, Carlsen J, Miederer I, Goetz C, Goldbrunner RH, et al. Imaging  
562 of integrin alpha(v)beta(3) expression in patients with malignant glioma by [18F]  
563 Galacto-RGD positron emission tomography. *Neuro-oncology*. 2009;11(6):861-70.  
564 doi: 10.1215/15228517-2009-024. PubMed PMID: 19401596; PubMed Central  
565 PMCID: PMC2802406.
- 566 24. Reardon DA, Nabors LB, Stupp R, Mikkelsen T. Cilengitide: an integrin-targeting  
567 arginine-glycine-aspartic acid peptide with promising activity for glioblastoma  
568 multiforme. *Expert opinion on investigational drugs*. 2008;17(8):1225-35. doi:  
569 10.1517/13543784.17.8.1225. PubMed PMID: 18616418; PubMed Central PMCID:  
570 PMC2832832.
- 571 25. Danhier F, Vroman B, Lecouturier N, Crockart N, Pourcelle V, Freichels H, et al.  
572 Targeting of tumor endothelium by RGD-grafted PLGA-nanoparticles loaded with  
573 paclitaxel. *J Control Release*. 2009;140(2):166-73. Epub 2009/08/25. doi: S0168-  
574 3659(09)00547-1 [pii]  
575 10.1016/j.jconrel.2009.08.011. PubMed PMID: 19699245.
- 576 26. Reddy GR, Bhojani MS, McConville P, Moody J, Moffat BA, Hall DE, et al. Vascular  
577 targeted nanoparticles for imaging and treatment of brain tumors. *Clin Cancer Res*.

- 578 2006;12(22):6677-86. doi: 10.1158/1078-0432.CCR-06-0946. PubMed PMID:  
579 17121886.
- 580 27. Shamay Y, Elkabets M, Li H, Shah J, Brook S, Wang F, et al. P-selectin is a  
581 nanotherapeutic delivery target in the tumor microenvironment. *Science translational*  
582 *medicine*. 2016;8(345):345ra87. doi: 10.1126/scitranslmed.aaf7374. PubMed PMID:  
583 27358497; PubMed Central PMCID: PMC5064151.
- 584 28. Laubli H, Borsig L. Selectins promote tumor metastasis. *Seminars in cancer biology*.  
585 2010;20(3):169-77. doi: 10.1016/j.semcancer.2010.04.005. PubMed PMID:  
586 20452433.
- 587 29. Kim YJ, Borsig L, Han HL, Varki NM, Varki A. Distinct selectin ligands on colon  
588 carcinoma mucins can mediate pathological interactions among platelets,  
589 leukocytes, and endothelium. *Am J Pathol*. 1999;155(2):461-72. doi:  
590 10.1016/S0002-9440(10)65142-5. PubMed PMID: 10433939; PubMed Central  
591 PMCID: PMC1866847.
- 592 30. Ludwig RJ, Boehme B, Podda M, Henschler R, Jager E, Tandi C, et al. Endothelial  
593 P-selectin as a target of heparin action in experimental melanoma lung metastasis.  
594 *Cancer Res*. 2004;64(8):2743-50. PubMed PMID: 15087389.
- 595 31. Nierodzik ML, Karpatkin S. Thrombin induces tumor growth, metastasis, and  
596 angiogenesis: Evidence for a thrombin-regulated dormant tumor phenotype. *Cancer*  
597 *Cell*. 2006;10(5):355-62. doi: 10.1016/j.ccr.2006.10.002. PubMed PMID: 17097558.
- 598 32. Borsig L, Wong R, Feramisco J, Nadeau DR, Varki NM, Varki A. Heparin and cancer  
599 revisited: mechanistic connections involving platelets, P-selectin, carcinoma mucins,  
600 and tumor metastasis. *Proc Natl Acad Sci U S A*. 2001;98(6):3352-7. doi:



- 601 10.1073/pnas.061615598. PubMed PMID: 11248082; PubMed Central PMCID:  
602 PMC30657.
- 603 33. Mousa SA, Petersen LJ. Anti-cancer properties of low-molecular-weight heparin:  
604 preclinical evidence. *Thromb Haemost.* 2009;102(2):258-67. doi: 10.1160/TH08-12-  
605 0832. PubMed PMID: 19652876.
- 606 34. Serres E, Debarbieux F, Stanchi F, Maggiorella L, Grall D, Turchi L, et al. Fibronectin  
607 expression in glioblastomas promotes cell cohesion, collective invasion of basement  
608 membrane in vitro and orthotopic tumor growth in mice. *Oncogene.*  
609 2014;33(26):3451-62. doi: 10.1038/onc.2013.305. PubMed PMID: 23912459.
- 610 35. Ohnishi T, Hiraga S, Izumoto S, Matsumura H, Kanemura Y, Arita N, et al. Role of  
611 fibronectin-stimulated tumor cell migration in glioma invasion in vivo: clinical  
612 significance of fibronectin and fibronectin receptor expressed in human glioma  
613 tissues. *Clin Exp Metastasis.* 1998;16(8):729-41. PubMed PMID: 10211986.
- 614 36. Neri D, Bicknell R. Tumour vascular targeting. *Nat Rev Cancer.* 2005;5(6):436-46.  
615 doi: 10.1038/nrc1627. PubMed PMID: 15928674.
- 616 37. Borsi L, Balza E, Bestagno M, Castellani P, Carnemolla B, Biro A, et al. Selective  
617 targeting of tumoral vasculature: comparison of different formats of an antibody  
618 (L19) to the ED-B domain of fibronectin. *Int J Cancer.* 2002;102(1):75-85. doi:  
619 10.1002/ijc.10662. PubMed PMID: 12353237.
- 620 38. Peiris PM, Bauer L, Toy R, Tran E, Pansky J, Doolittle E, et al. Enhanced Delivery  
621 of Chemotherapy to Tumors Using a Multicomponent Nanochain with Radio-  
622 Frequency-Tunable Drug Release. *ACS Nano.* 2012;6(5):4157-68. Epub  
623 2012/04/11. doi: 10.1021/nn300652p. PubMed PMID: 22486623.

- 624 39. Baumann BC, Kao GD, Mahmud A, Harada T, Swift J, Chapman C, et al. Enhancing  
625 the efficacy of drug-loaded nanocarriers against brain tumors by targeted radiation  
626 therapy. *Oncotarget*. 2013;4(1):64-79. doi: 10.18632/oncotarget.777. PubMed  
627 PMID: 23296073; PubMed Central PMCID: PMC3702208.  
628

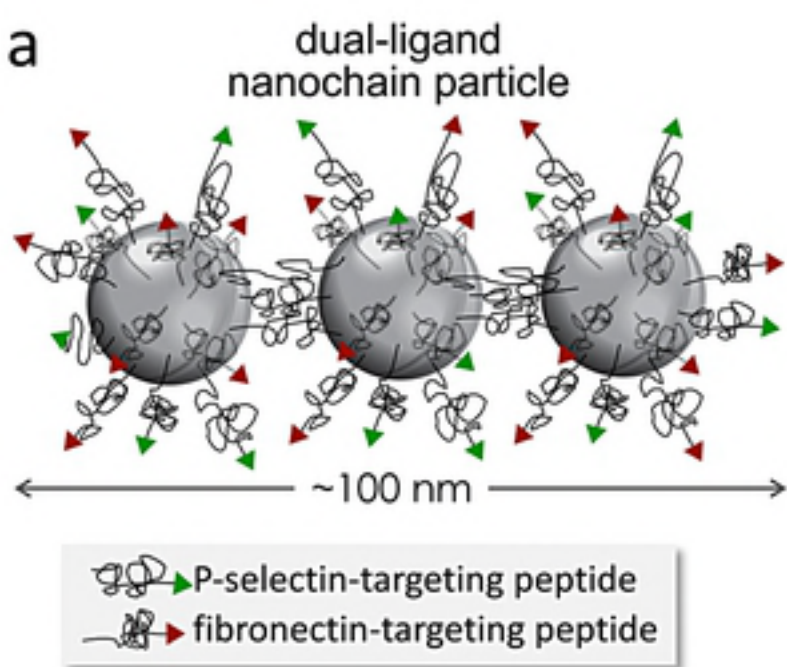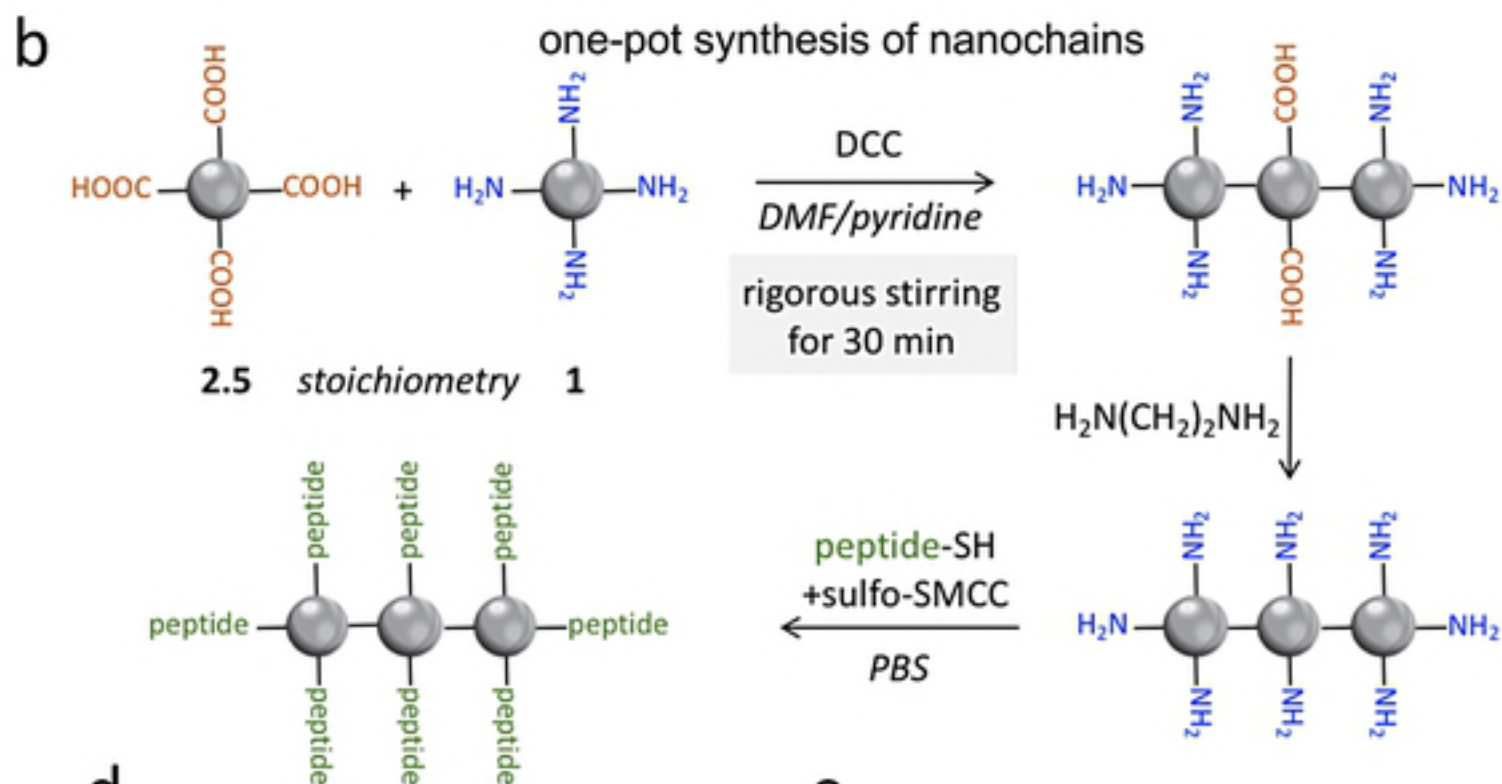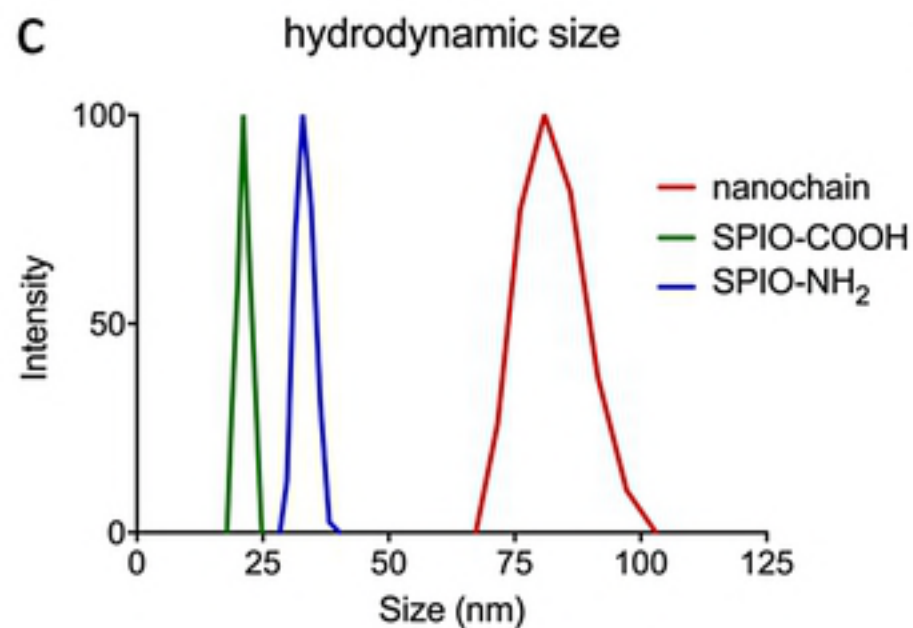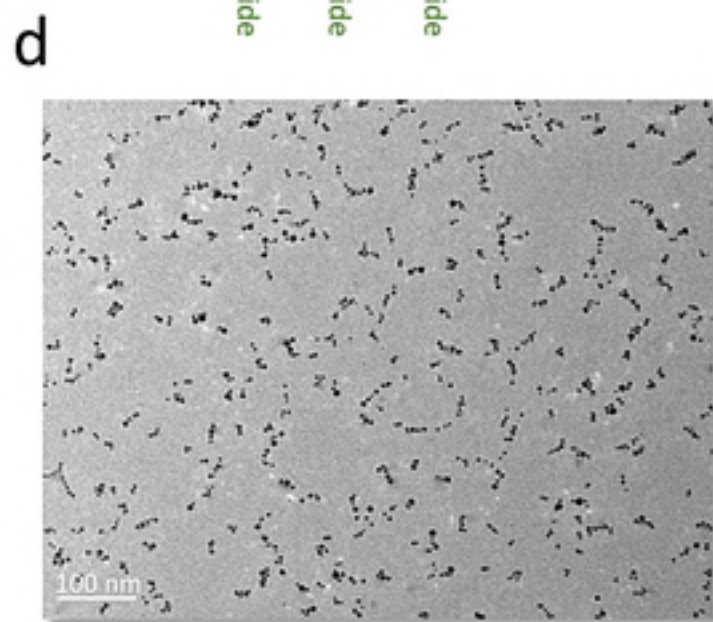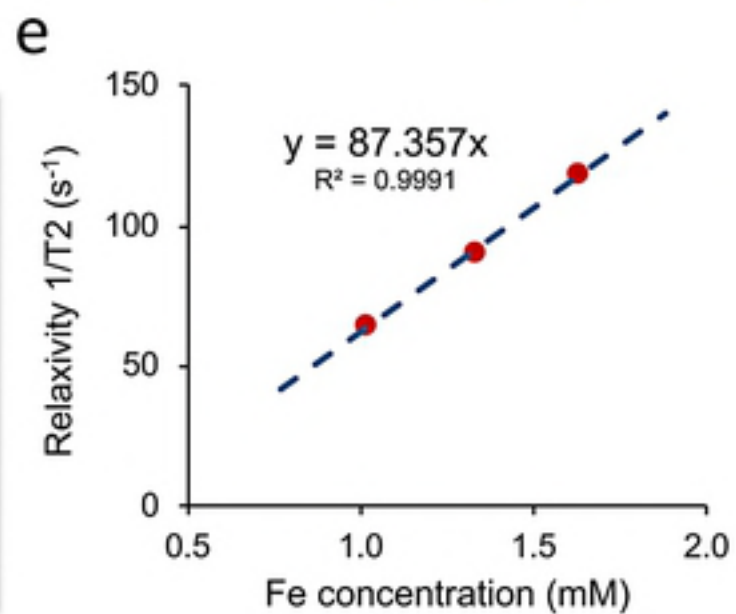

# Organ distribution

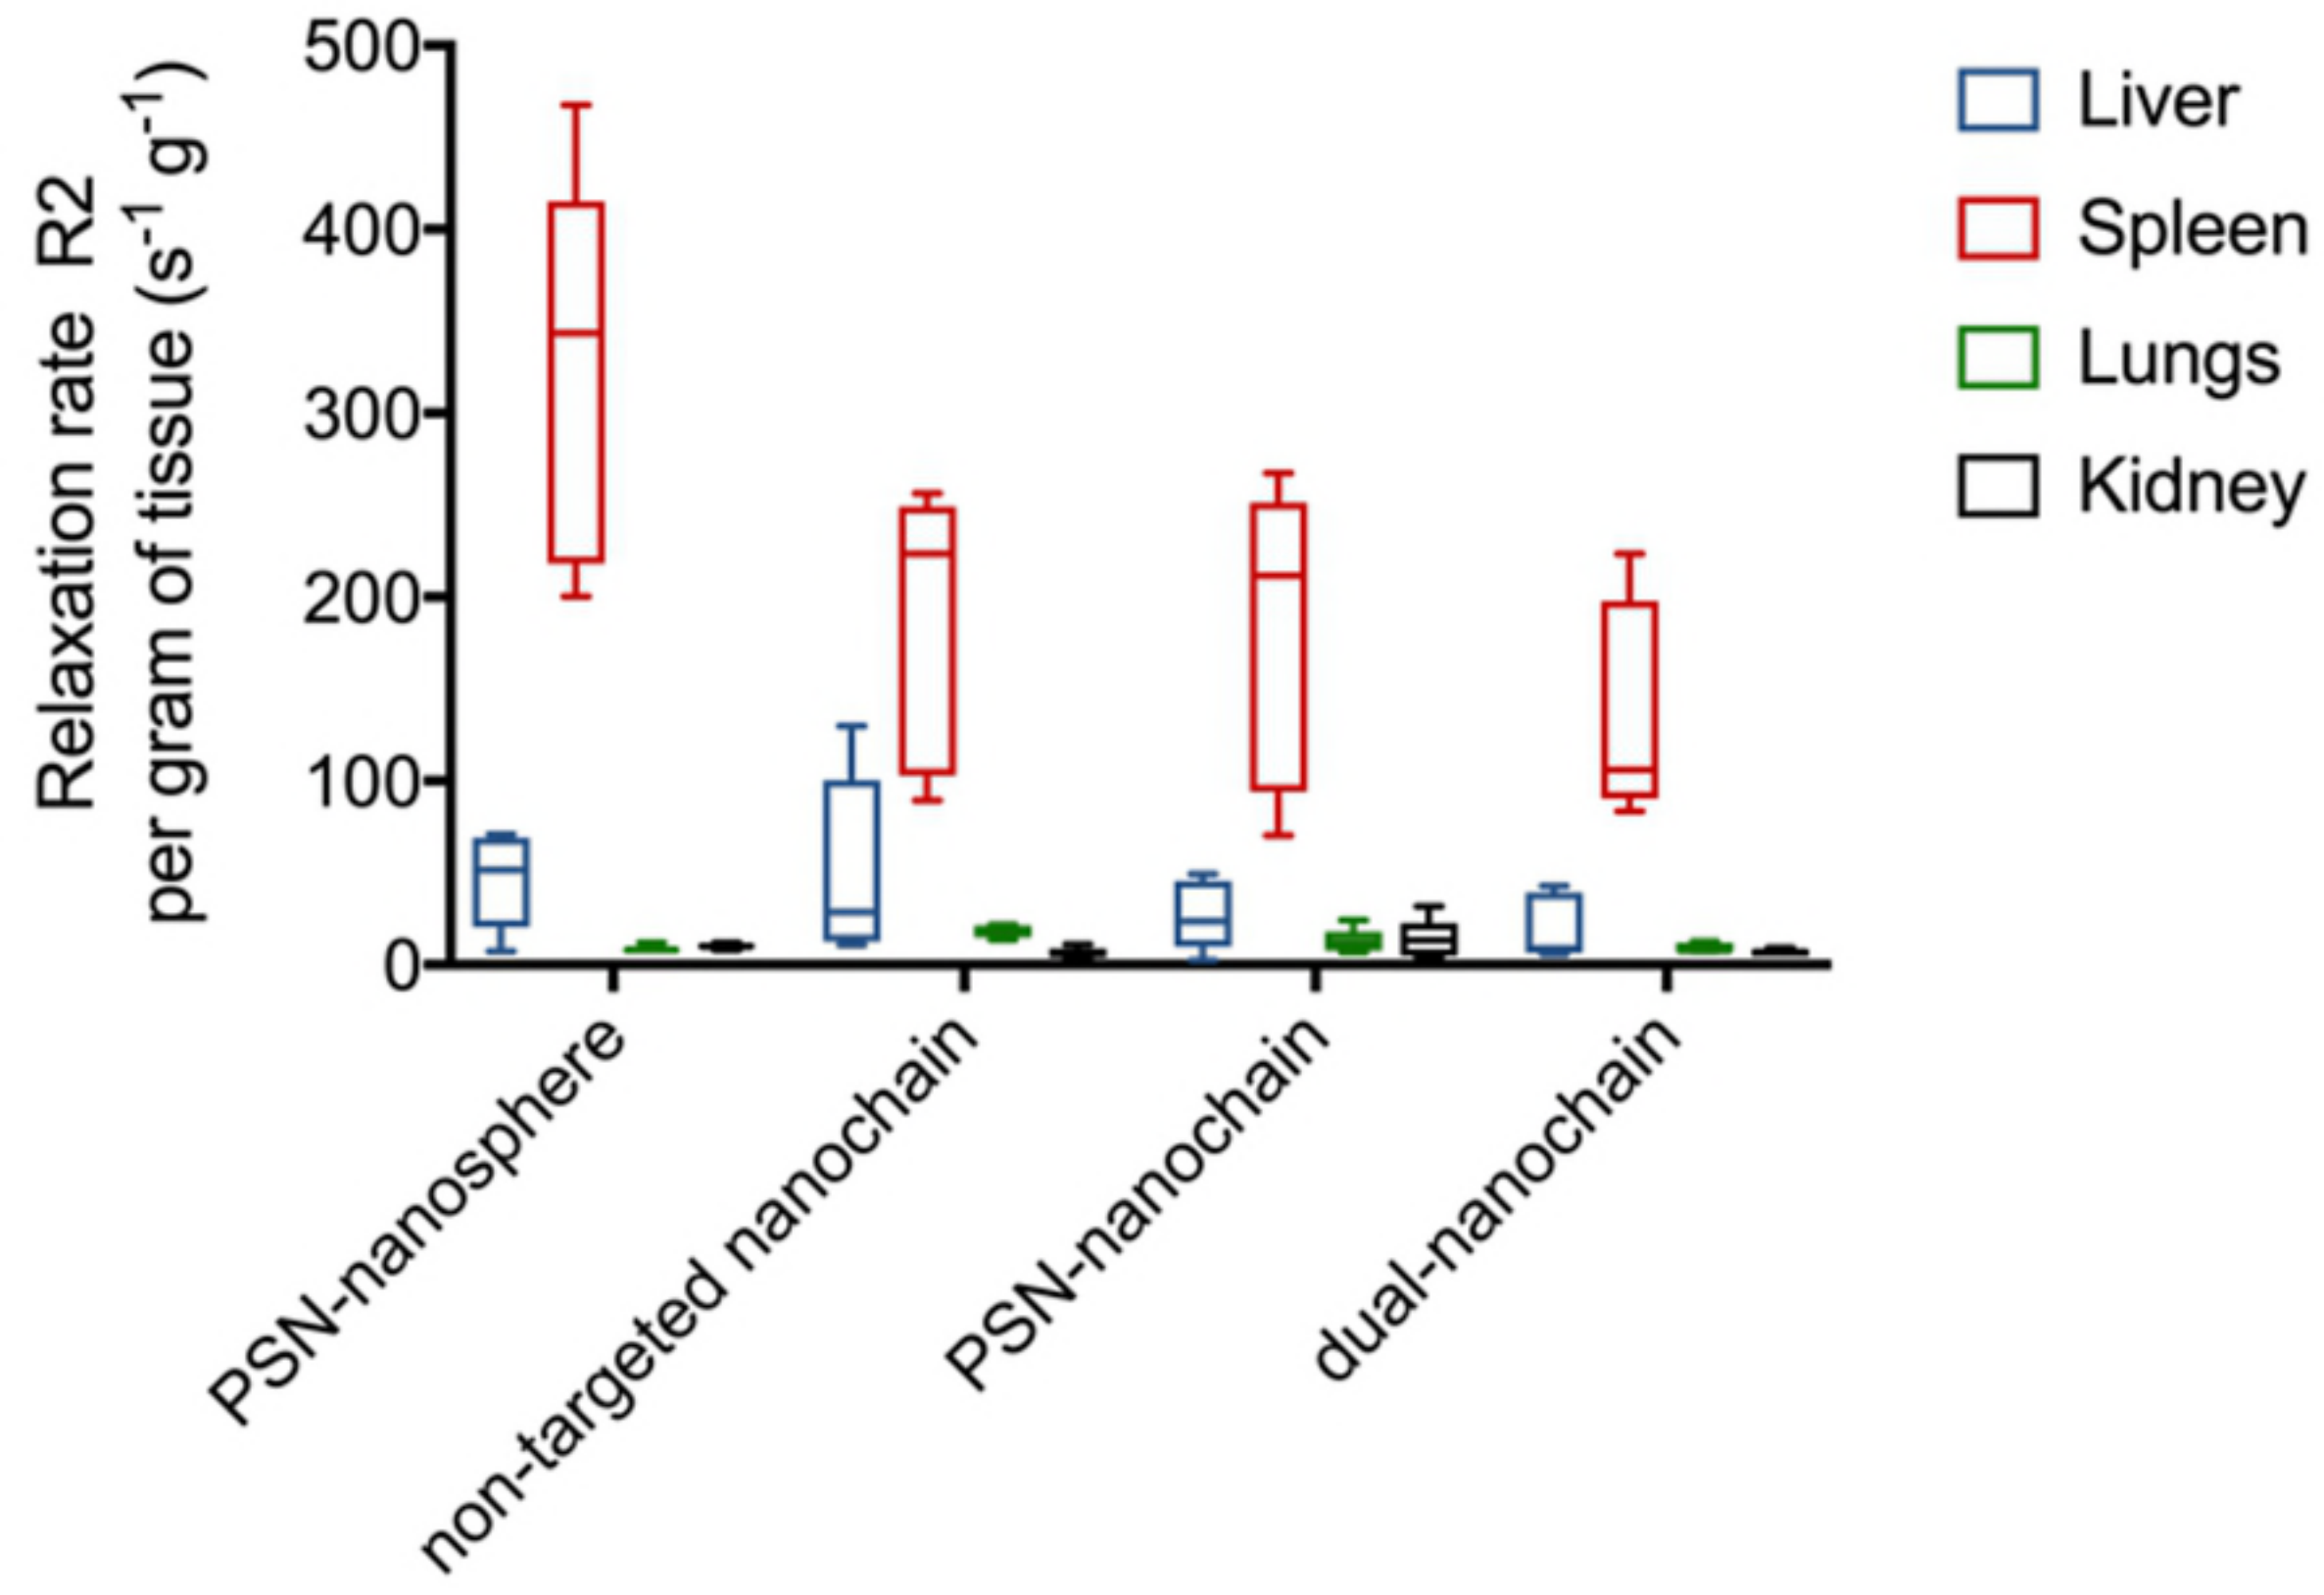

### a tumor targeting nanospheres vs. nanochains

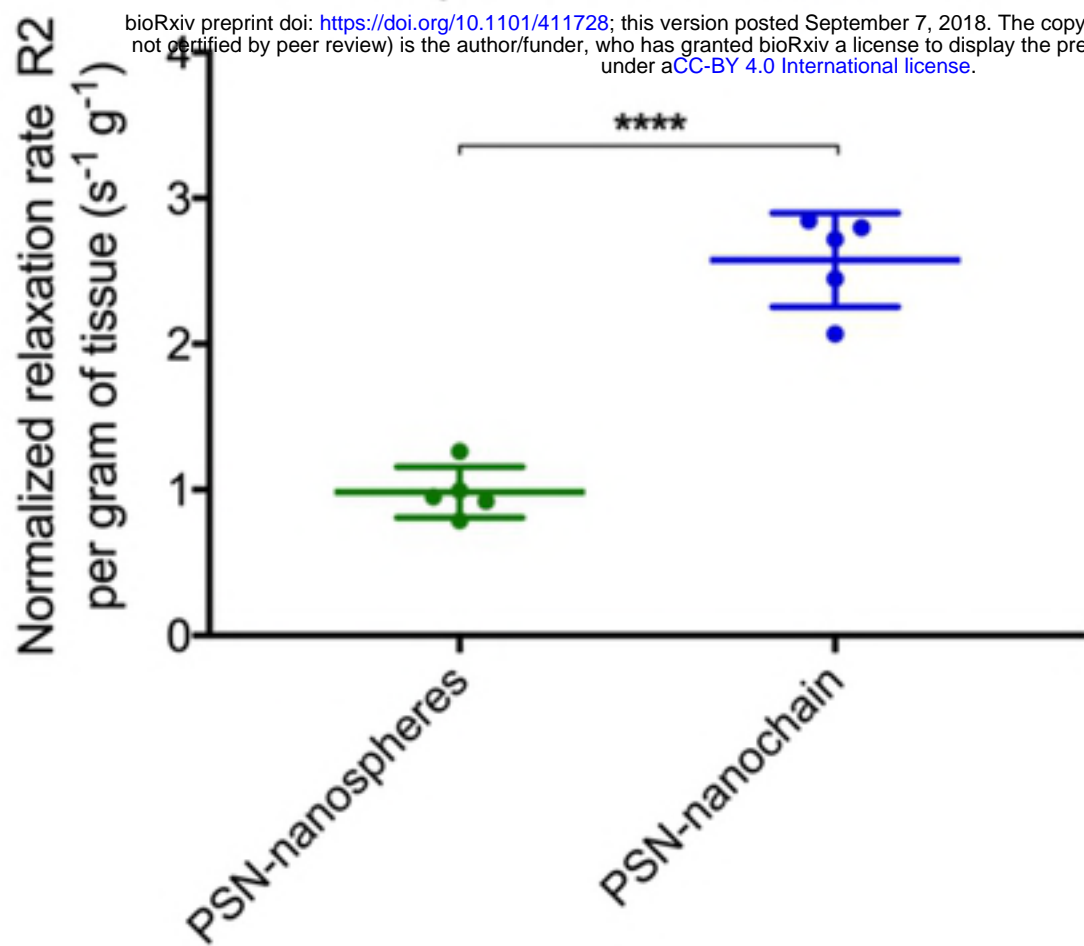

### b tumor targeting

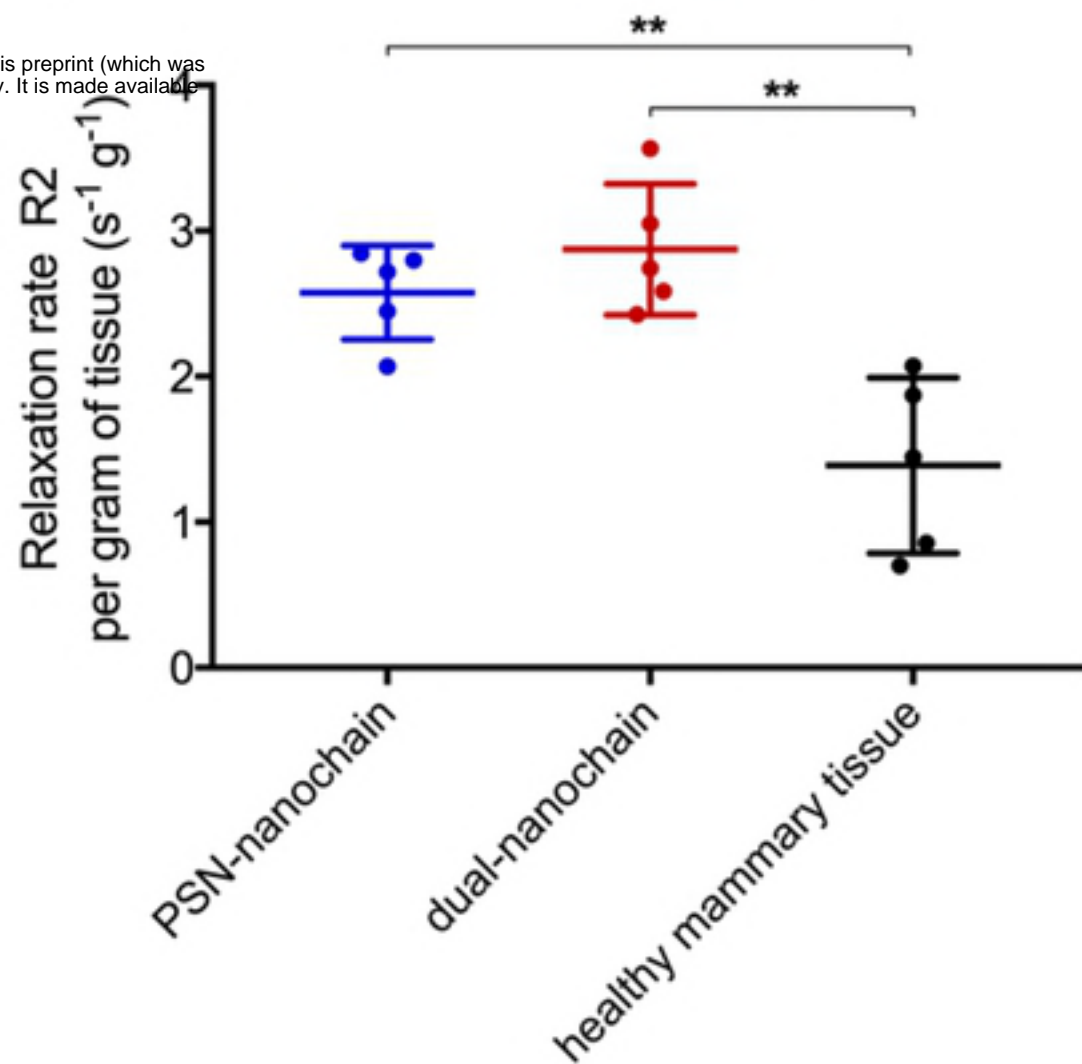

### c tumor burden

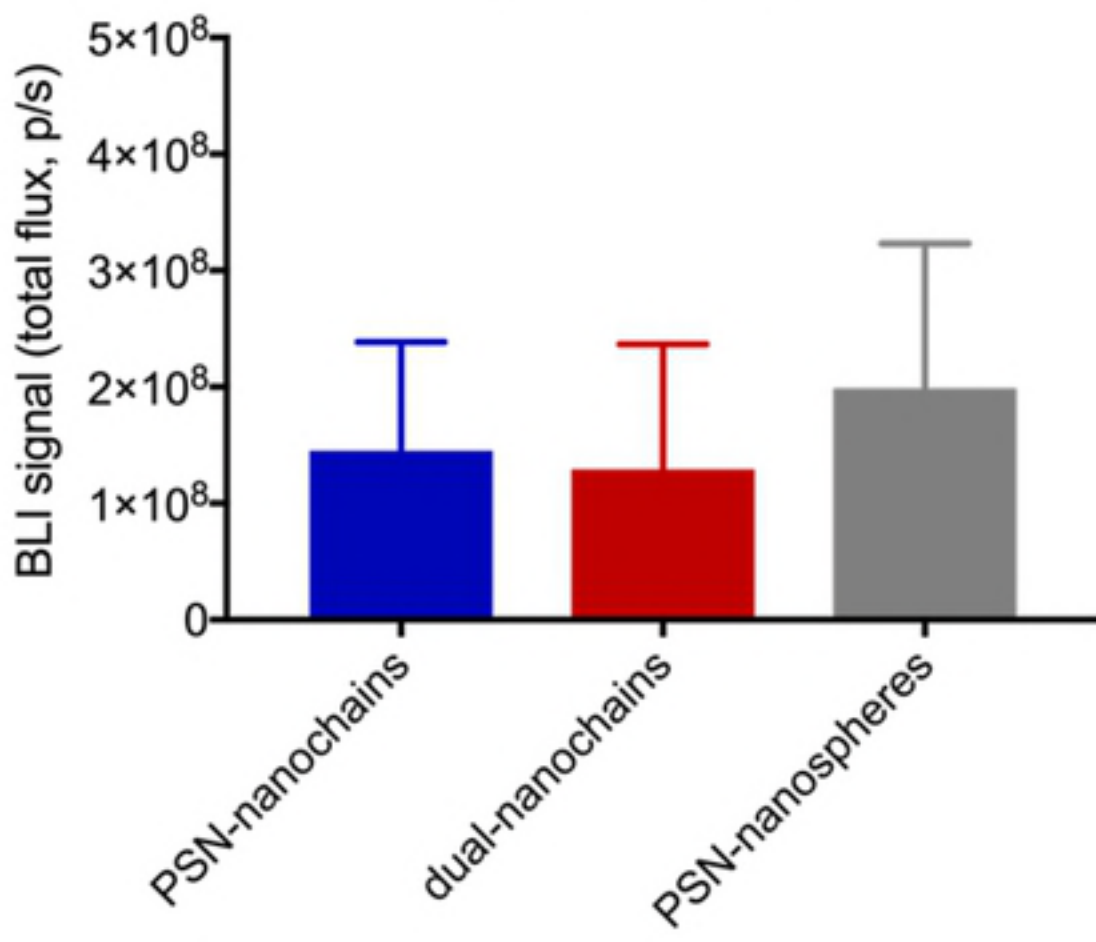

### d targeting accuracy

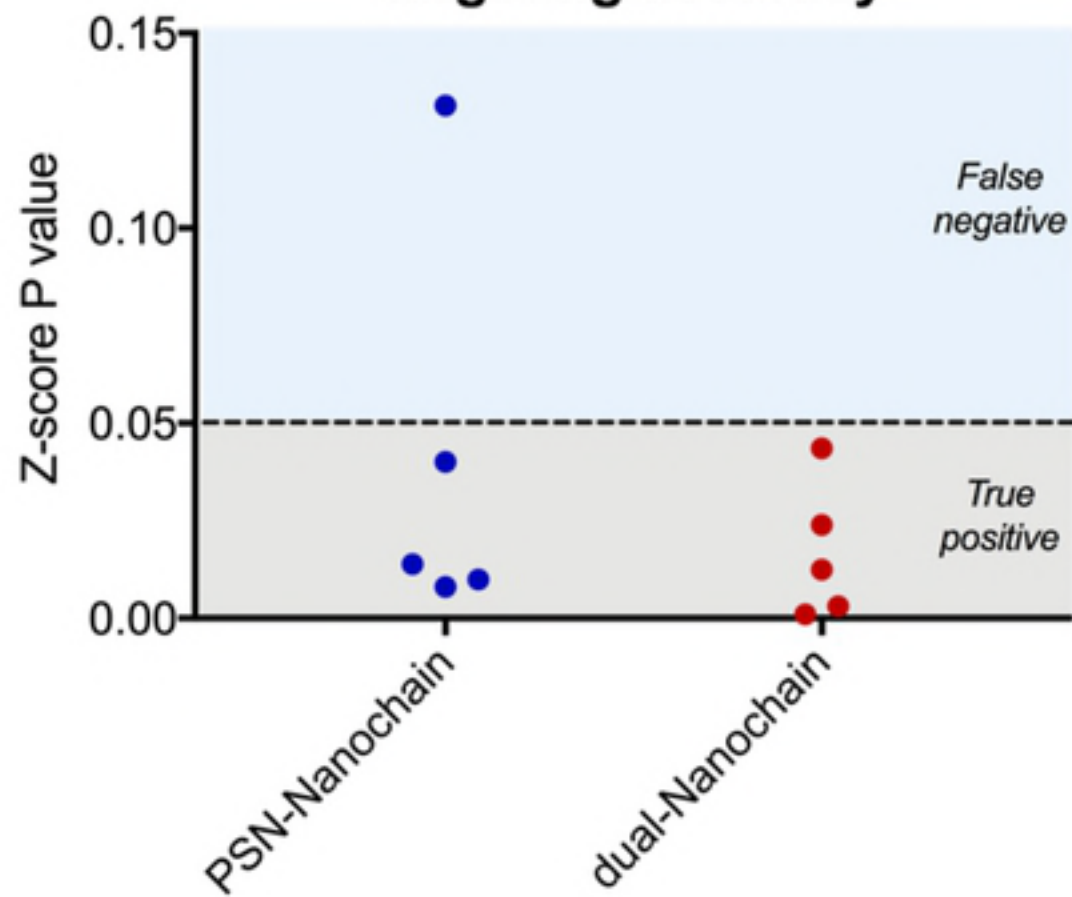

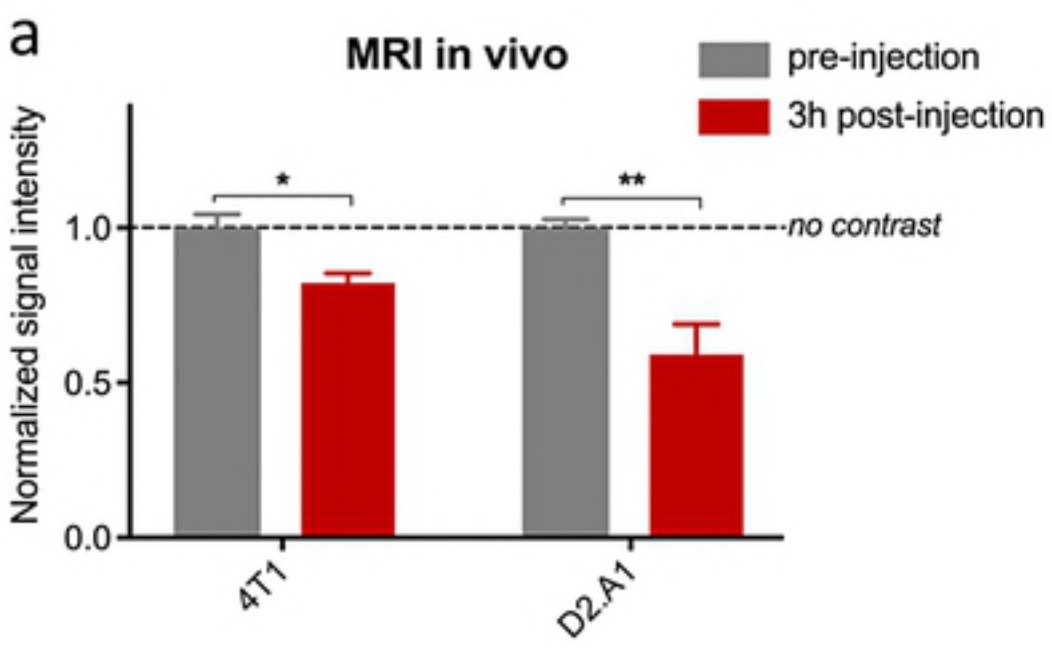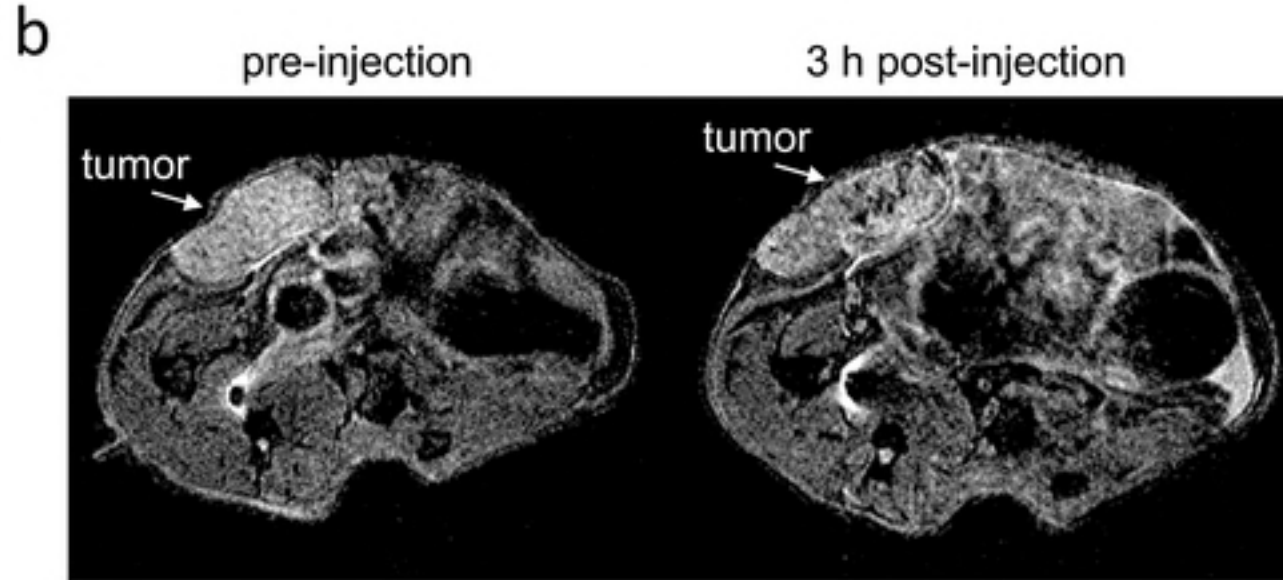

**a**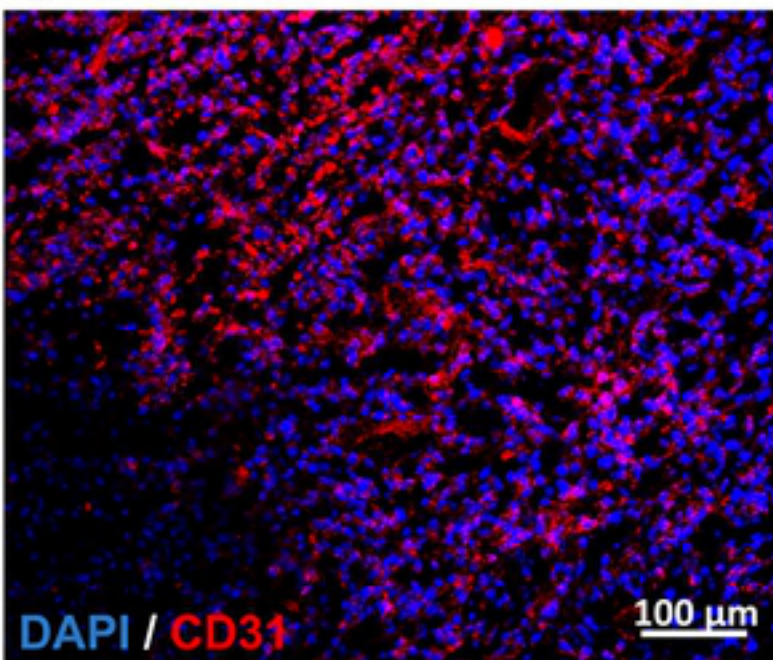*serial tissue sections*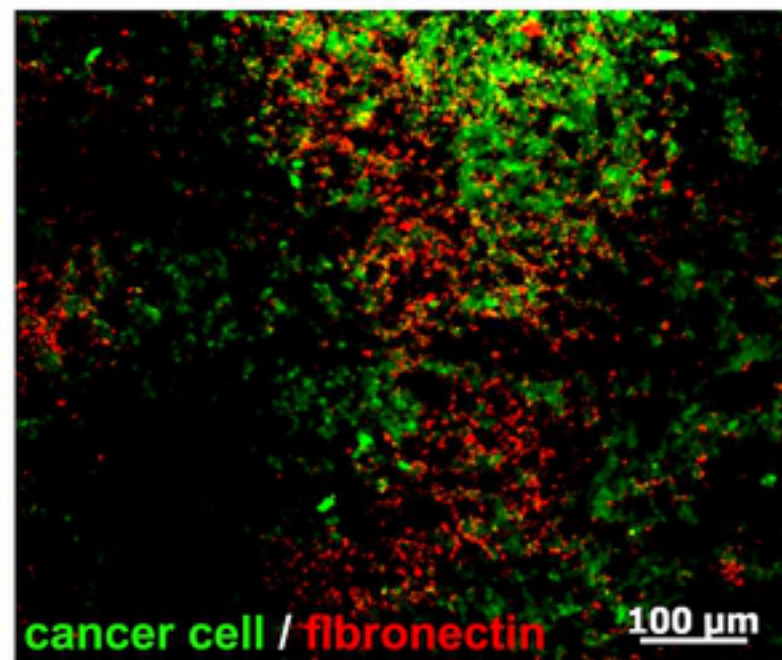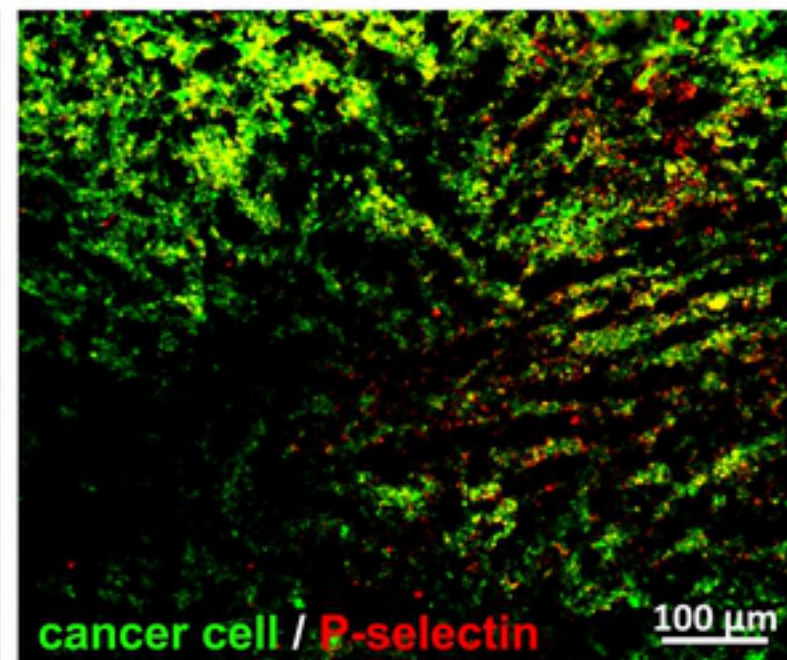**b**

tumor tissue

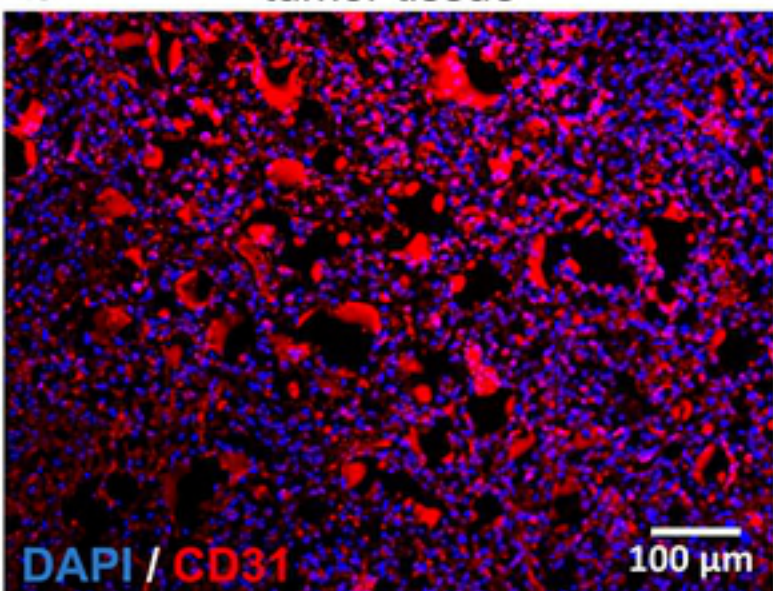*from same tumor tissue at high magnification*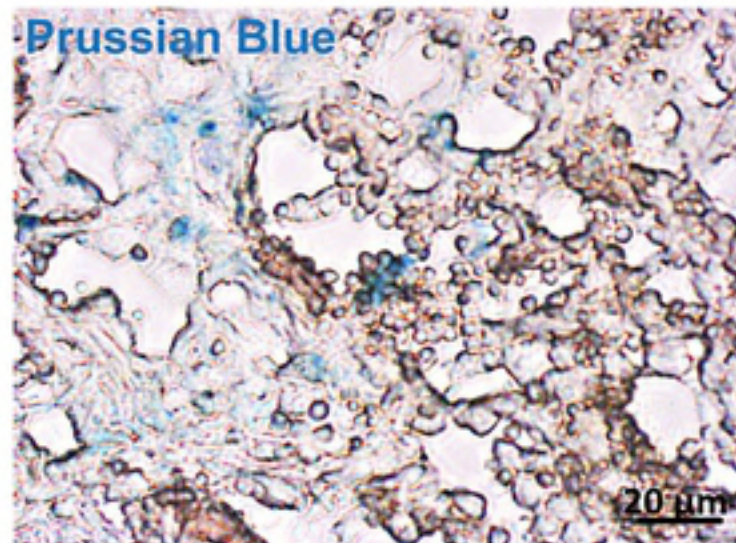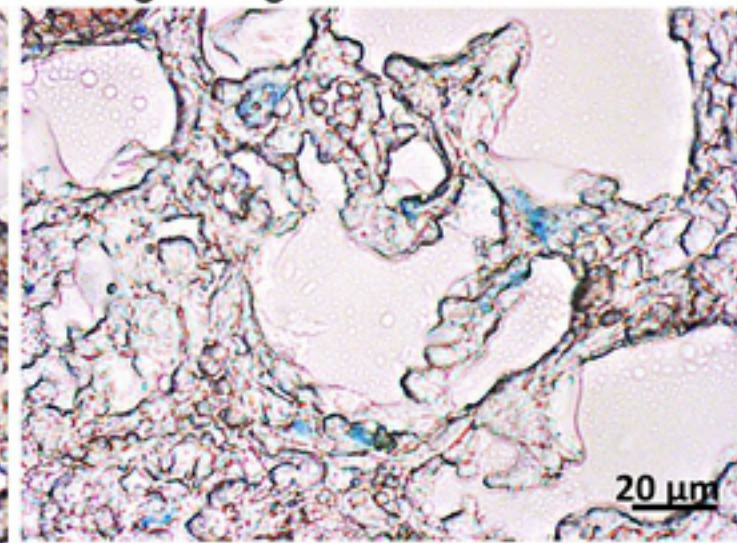

Source: https://www.biorxiv.org/content/10.1101/411728v1.full.pdf
